# Supplementary material
Source: Springer Nature journal article supplement (https://www.springermedizin.de/resource/supplementary/12875_2013_1178_MOESM1_ESM.pdf/9435988)
Supplement: MOESM1 [file 9435988]

19-24

25-44

45-64

65-79

80+

Female

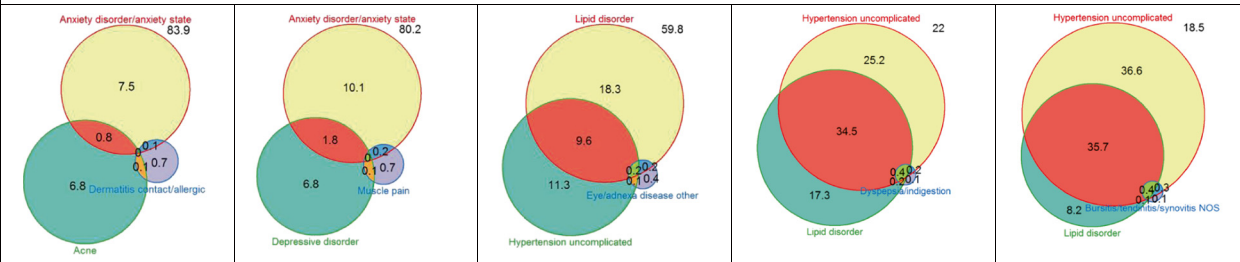

Male

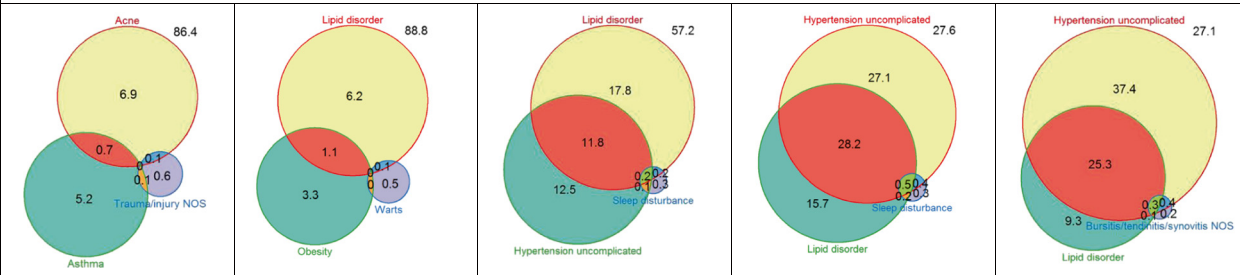

Chronic diseases: green and red lettering. Acute disease: blue lettering. Value of observed prevalence expressed as percentage.

\* Expected co-occurrence of diseases was obtained as the product of the separate prevalences, assuming statistical independence of the diseases concerned.
